# Supplementary material
Source: PubMed Central journal article supplement (PMC5856007)
Supplement: NIHMS948555-supplement-Supplemental_Tables.pdf [file NIHMS948555-supplement-Supplemental_Tables.pdf]

## SUPPLEMENTARY MATERIALS

### **Supplementary Fig. 1** – *Mafa-KIR3DL* and *Mafa-KIR3DS* phylogenetic trees

Phylogenetic analysis of MCM *KIR3DL* and *KIR3DS* sequences. Both phylogenetic trees contain the human *KIR3DL1\*00701* allele as an outgroup (AF262973). Bootstrapping values are shown to the left of nodes. Novel sequences are highlighted in bold font. A, the tree contains *KIR3DL* sequences. Vertical bars denote lineages. B, the tree contains *KIR3DS* sequences.

### **Supplementary Table 1** – PacBio CCS cohort

### **Supplementary Table 2** – WGS//MES cohort

### **Supplementary Table 3** – Rhexome1.0 target capture components

**Supplementary Table 4** – Coverage from VCRome2.1-to-“spike-in” mixing ratios for a single rhesus macaque.

### **Supplementary Table 5** – MES target capture coverage for 36 MCM

### **Supplementary Table 6** – Comparison of sequences identified by PacBio CCS versus WGS/MES

Table 1 - Asseccion numbers for PacBio-identified sequences

| Haplotype   | Gene              | Accession       | Amino Acids | Representative animals | Prev Accession |
|-------------|-------------------|-----------------|-------------|------------------------|----------------|
| K1          | KIR1D             | KX892645        | 279         | CY0161,CY0327          | EU419110       |
| K1K7        | KIR2DL4           | KX892646        | 375         | CY0161,CY0355          | EU419111       |
| K1K7        | KIR2DL4-SV        | KX892647        | 277         | CY0563                 | EU419111       |
| K1          | KIR3DS            | KX892648        | 374         | CY0161,CY0327          | EU419113       |
| K1          | KIR3DL7           | KX892649        | 447         | CY0161,CY0327          | EU419109       |
| K1          | KIR3DL11          | KX892650        | 447         | CY0161,CY0327          | EU419101       |
| K1          | KIR3DL11-SV       | KX892651        | 349         | CY0161,CY0327          | EU419102       |
| K2          | KIR1D             | KX892652        | 279         | CY0166,CY0568          | EU419124       |
| K2K4K5      | KIR2DL4           | KX892653        | 375         | CY0166,CY0570,CY0390   | EU419114       |
| K2          | KIR3DL2           | KX892654        | 444         | CY0166,CY0353          | EU419090       |
| K2          | KIR3DL2-SV        | KX892655        | 394         | CY0425,CY0568          | EU419091       |
| K2          | KIR3DL2           | KX892656        | 444         | CY0166,CY0353          | EU419083       |
| <b>K2</b>   | <b>KIR3DS</b>     | <b>KX892657</b> | <b>343</b>  | CY0166,CY0353          |                |
| K2          | KIR3DS            | KX892658        | 386         | CY0166,CY0568          | EU419092       |
| K2          | KIR3DS            | KX892659        | 343         | CY0166,CY0568          | EU419079       |
| K2          | KIR3DL1           | KX892660        | 447         | CY0166,CY0568          | EU419076       |
| K2          | KIR3DL7           | KX892661        | 461         | CY0163                 | EU419078       |
| K2          | KIR3DL7           | KX892662        | 447         | CY0166,CY0568          | EU419089       |
| K3K4        | KIR1D             | KX892663        | 176         | CY0111,CY0570          | EU419120       |
| <b>K3K4</b> | <b>KIR1D-SV</b>   | <b>KX892664</b> | <b>210</b>  | CY0111,CY0570          |                |
| <b>K3</b>   | <b>KIR2DL4</b>    | <b>KX892665</b> | <b>375</b>  | CY0111,CY0390          |                |
| <b>K3</b>   | <b>KIR2DL4-SV</b> | <b>KX892666</b> | <b>280</b>  | CY0111,CY0390          |                |
| K3          | KIR3DL2           | KX892667        | 444         | CY0111,CY0390          | EU419123       |
| <b>K3</b>   | <b>KIR3DS</b>     | <b>KX892668</b> | <b>374</b>  | CY0111,CY0390          |                |
| K3          | KIR3DL11          | KX892669        | 447         | CY0111,CY0390          | EU419119       |
| K4          | KIR3DL2           | KX892670        | 444         | CY0570,CY0332          | EU688993       |
| <b>K4</b>   | <b>KIR3DL2-SV</b> | <b>KX892671</b> | <b>394</b>  | CY0570,CY0332          |                |
| <b>K4</b>   | <b>KIR3DL2-SV</b> | <b>KX892672</b> | <b>435</b>  | CY0570,CY0332          |                |
| K4          | KIR3DS            | KX892673        | 374         | CY0570,CY0332          | EU419121       |
| K4          | KIR3DL11          | KX892674        | 447         | CY0570,CY0332          | EU419115       |
| K4          | KIR3DL11-SV       | KX892675        | 397         | CY0570,CY0342          | EU419116       |
| K5          | KIR3DL2           | KX892676        | 444         | CY0327,CY0163          | EU419105       |
| K5          | KIR3DL2-SV        | KX892677        | 435         | CY0327,CY0163          | EU419106       |
| <b>K5</b>   | <b>KIR3DL2-SV</b> | <b>KX892678</b> | <b>394</b>  | CY0327,CY0163          |                |
| K5          | KIR3DS            | KX892679        | 374         | CY0327,CY0163          | EU419126       |
| K5          | KIR3DS            | KX892680        | 386         | CY0327,CY0163          | EU419097       |
| K5          | KIR3DS            | KX892681        | 386         | CY0327,CY0163          | EU419098       |
| K5          | KIR3DL1           | KX892682        | 458         | CY0327,CY0163          | EU419075       |
| K5          | KIR3DL7           | KX892683        | 447         | CY0327,CY0163          | EU419103       |
| K5          | KIR3DL7           | KX892684        | 447         | CY0327,CY0354          | EU419099       |
| <b>K6</b>   | <b>KIR1D</b>      | <b>KX892685</b> | <b>279</b>  | CY0568                 |                |
| <b>K6</b>   | <b>KIR3DL2</b>    | <b>KX892686</b> | <b>444</b>  | CY0568,CY0330          |                |
| K6          | KIR3DS            | KX892687        | 386         | CY0330                 | EU688994       |
| <b>K6</b>   | <b>KIR3DS</b>     | <b>KX892688</b> | <b>374</b>  | CY0568,CY0330          |                |
| <b>K6</b>   | <b>KIR3DS</b>     | <b>KX892689</b> | <b>374</b>  | CY0568,CY0330          |                |
| K6          | KIR3DL11          | KX892690        | 447         | CY0568,CY0330          | EU688995       |
| K7          | KIR3DL2           | KX892691        | 440         | CY0356,CY0336          | EU419080       |
| K7          | KIR3DL2-SV        | KX892692        | 348         | CY0356,CY0336          | EU419081       |
| K7          | KIR3DS            | KX892693        | 374         | CY0356,CY0336          | EU419086       |
| <b>K7</b>   | <b>KIR3DS</b>     | <b>KX892694</b> | <b>374</b>  | CY0356,CY0336          |                |
| K7          | KIR3DL7           | KX892695        | 447         | CY0356,CY0336          | EU419087       |
| K7          | KIR3DL7-SV        | KX892696        | 349         | CY0356,CY0336          | EU419088       |
| K7          | KIR3DL11          | KX892697        | 447         | CY0356,CY0336          | EU419093       |
| <b>K8</b>   | <b>KIR1D</b>      | <b>KX892698</b> | <b>312</b>  | CY0322,CY0558          |                |
| K8          | KIR3DS            | KX892699        | 447         | CY0332                 | EU419122       |
| K8          | KIR3DL7           | KX892700        | 397         | CY0322,CY0558          | EU419077       |
| K8          | KIR3DL7           | KX892701        | 374         | CY0322,CY0558          | EU419084       |
| K8          | KIR3DL7-SV        | KX892702        | 447         | CY0322,CY0558          | EU419085       |
| K8          | KIR3DL11          | KX892703        | 447         | CY0322,CY0558          | EU419094       |
| K8          | KIR3D11-SV        | KX892704        | 349         | CY0322,CY0558          | EU419095       |

Supplementary Figure 1 - Mafa-KIR3DL and Mafa -KIR3DS phylogenetic trees

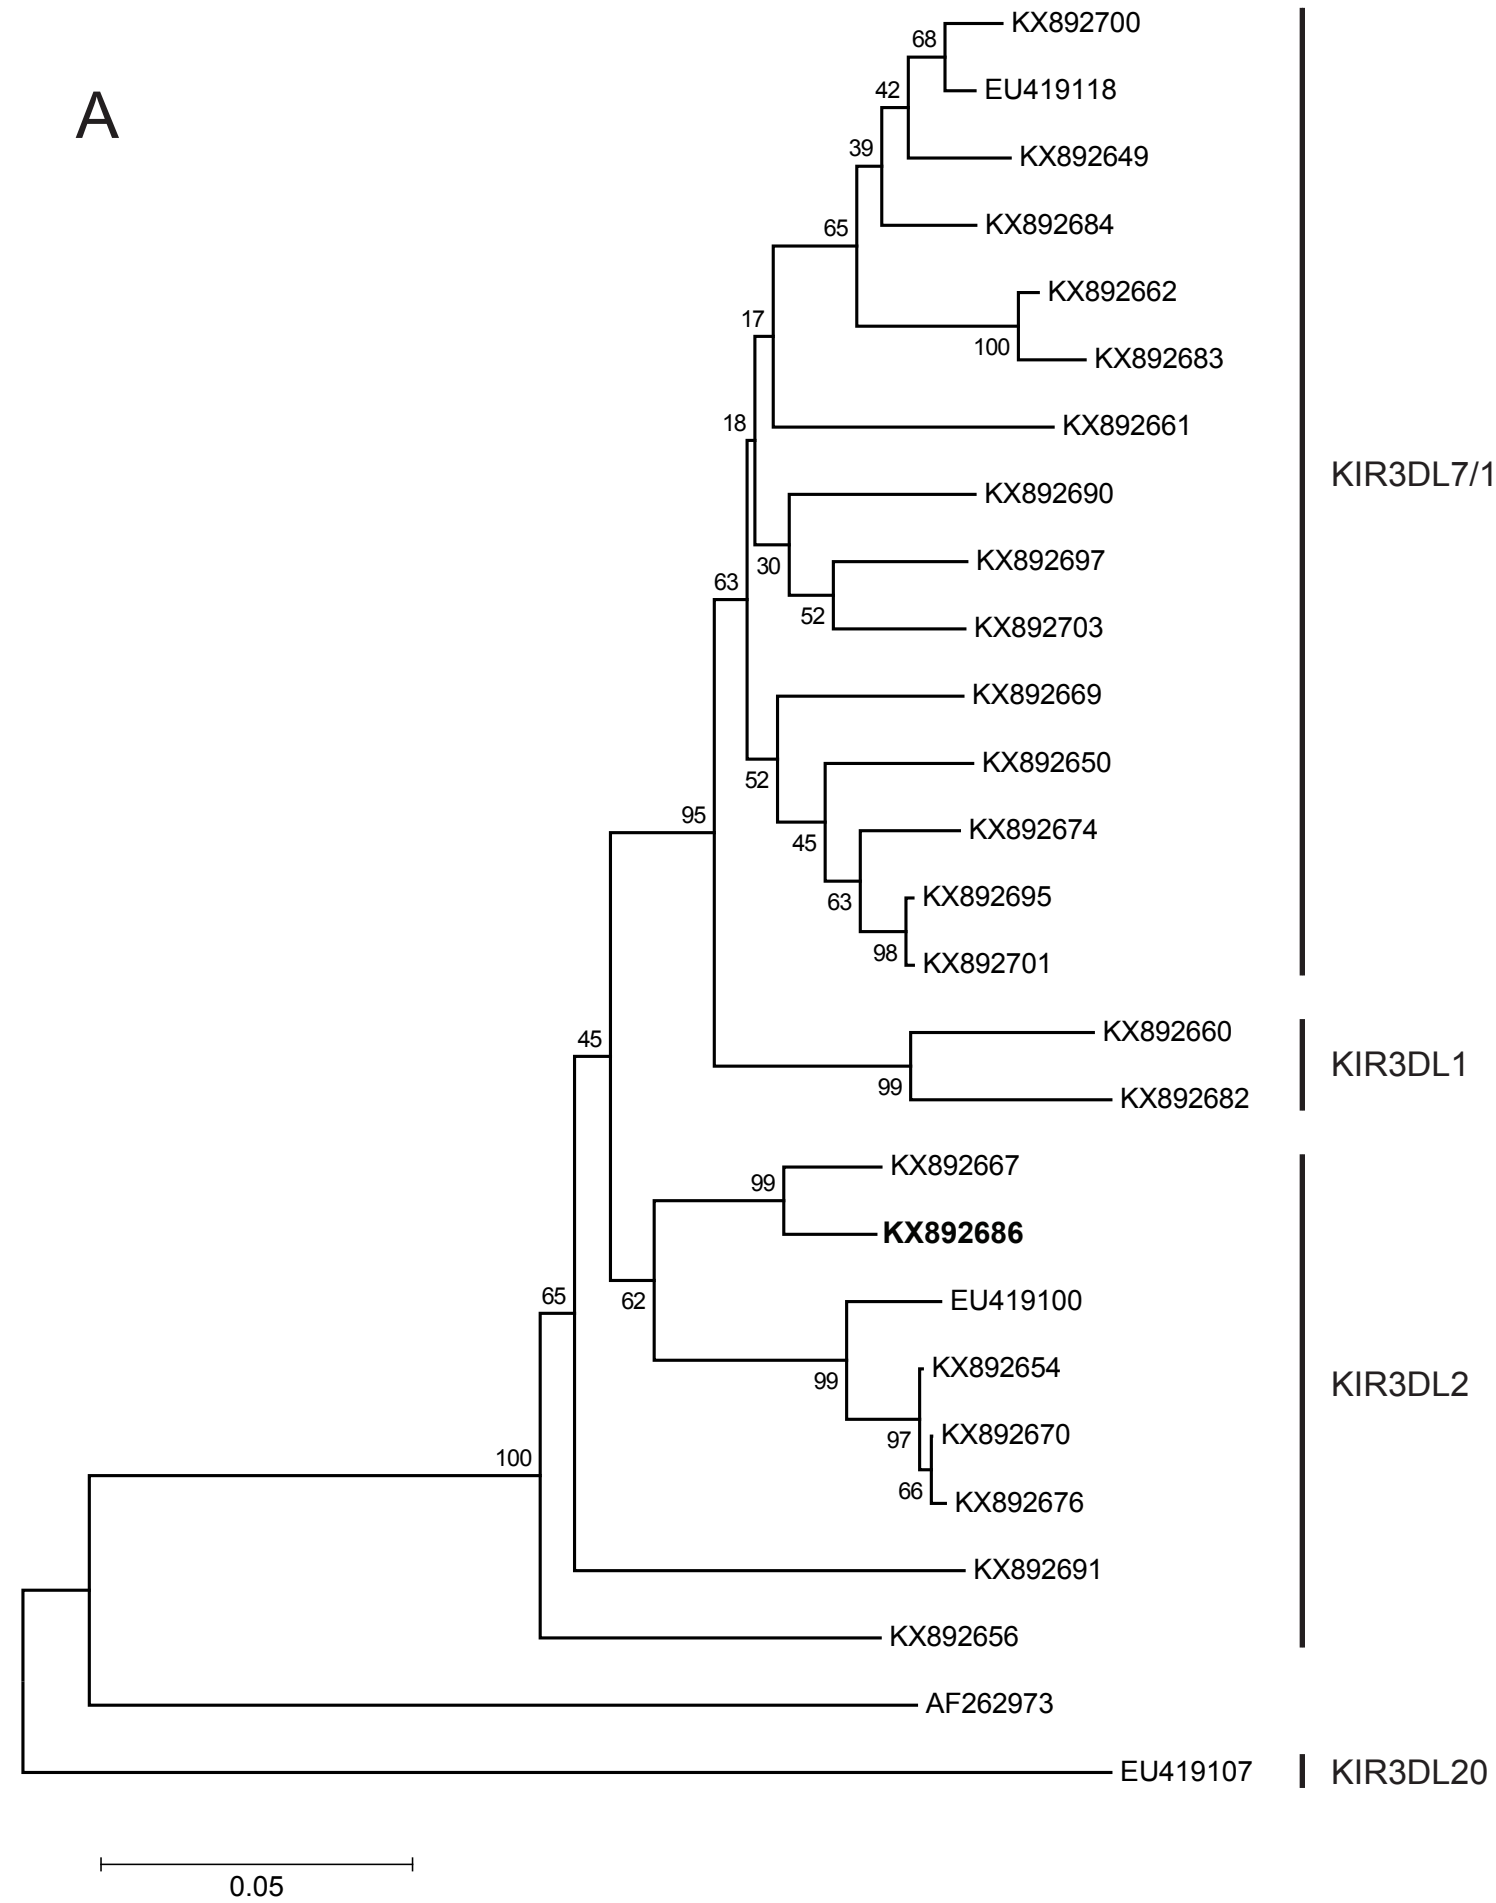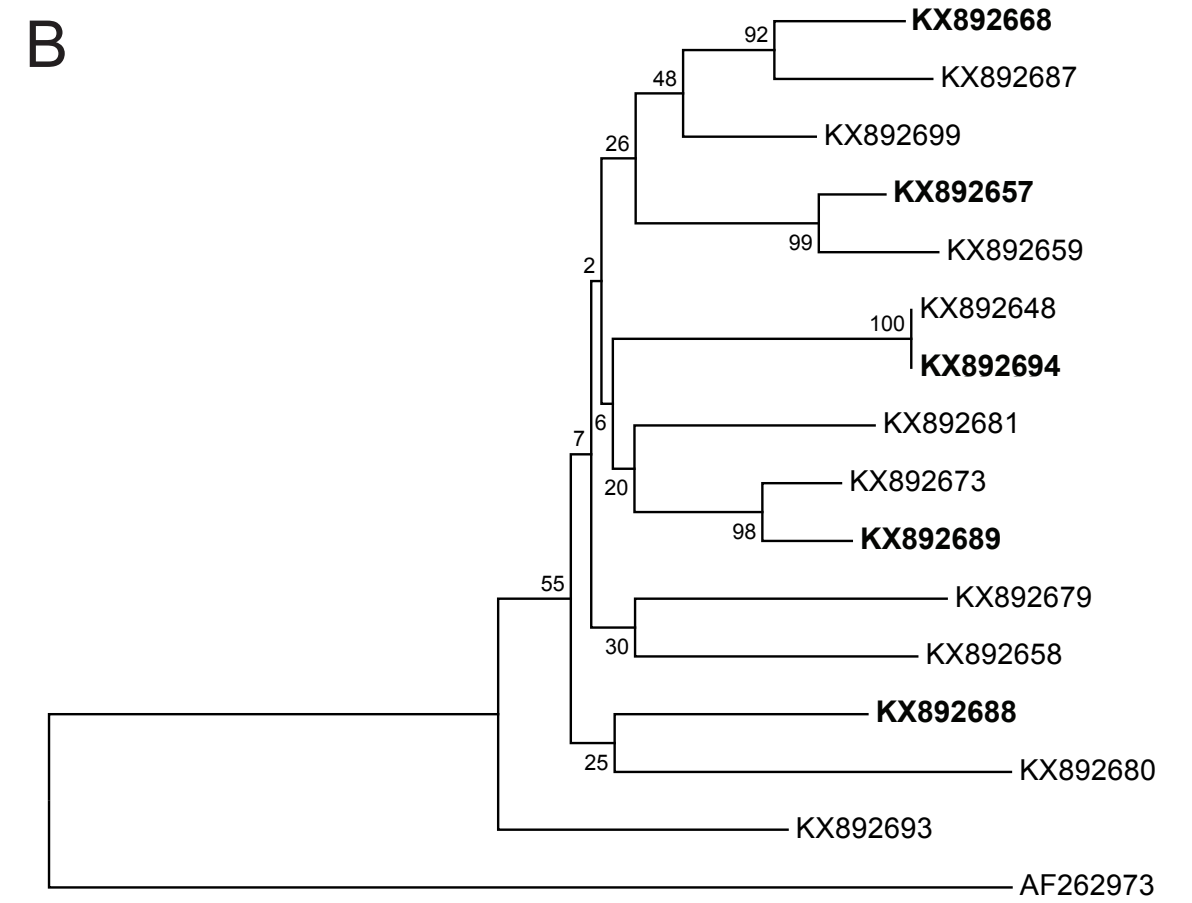

Supplementary Table 1 - PacBio CCS cohort

| Animal ID | Expected KIR | # PacBio Reads Mapped | WGS/MES |
|-----------|--------------|-----------------------|---------|
| CY0111    | K3/K3        | 889                   | MES     |
| CY0161    | K1/K1        | 1313                  | MES     |
| CY0162    | N/A          | 1031                  | MES     |
| CY0163    | N/A          | 1448                  | MES     |
| CY0164    | N/A          | 896                   | MES     |
| CY0166    | K2/K2        | 1329                  | MES     |
| CY0322    | K3/K8        | 1020                  | WGS     |
| CY0323    | K1/K7        | 1038                  | WGS     |
| CY0327    | K1/K5        | 998                   | WGS     |
| CY0329    | K1/K7        | 1332                  | WGS     |
| CY0330    | K4/K6        | 344                   | WGS     |
| CY0332    | K3/K4        | 689                   | WGS     |
| CY0336    | K4/K7        | 1020                  | WGS     |
| CY0340    | N/A          | 1533                  | MES     |
| CY0342    | N/A          | 1286                  | MES     |
| CY0350    | N/A          | 2535                  | MES     |
| CY0351    | N/A          | 455                   | MES     |
| CY0352    | N/A          | 698                   | MES     |
| CY0353    | N/A          | 342                   | MES     |
| CY0354    | N/A          | 656                   | MES     |
| CY0355    | N/A          | 709                   | MES     |
| CY0356    | N/A          | 1598                  | MES     |
| CY0390    | N/A          | 993                   | MES     |
| CY0425    | N/A          | 875                   | MES     |
| CY0558    | N/A          | 873                   | MES     |
| CY0563    | N/A          | 655                   | MES     |
| CY0567    | N/A          | 1736                  | MES     |
| CY0568    | N/A          | 2392                  | MES     |
| CY0570    | N/A          | 599                   | MES     |
| CY0571    | N/A          | 1281                  | MES     |

Supplementary Table 2 - WGS/MES cohort

| Animal ID | Type       | # Reads Mapped |
|-----------|------------|----------------|
| CY0320    | WGS        | 1,210,339,744  |
| CY0321    | WGS        | 1,222,977,688  |
| CY0322    | WGS        | 1,093,240,092  |
| CY0323    | WGS        | 1,161,761,415  |
| CY0324    | WGS        | 1,192,434,815  |
| CY0325    | WGS        | 1,091,870,521  |
| CY0326    | WGS        | 1,014,048,607  |
| CY0327    | WGS        | 1,158,978,497  |
| CY0328    | WGS        | 1,356,197,360  |
| CY0329    | WGS        | 1,169,431,587  |
| CY0330    | WGS        | 1,120,820,126  |
| CY0331    | WGS        | 1,314,518,723  |
| CY0332    | WGS        | 1,206,633,787  |
| CY0333    | WGS        | 1,217,425,129  |
| CY0334    | WGS        | 1,094,844,832  |
| CY0335    | WGS        | 1,298,840,412  |
| CY0336    | WGS        | 1,244,446,132  |
| CY0337    | WGS        | 1,357,235,243  |
| CY0642    | VCRome2.1  | 79,960,380     |
| CY0643    | VCRome2.1  | 86,437,446     |
| CY0646    | VCRome2.1  | 110,114,349    |
| CY0648    | VCRome2.1  | 106,500,711    |
| CY0649    | VCRome2.1  | 78,732,566     |
| CY0651    | VCRome2.1  | 103,106,107    |
| CY0652    | VCRome2.1  | 89,230,575     |
| CY0654    | VCRome2.1  | 99,348,080     |
| CY0111    | Rhexome1.0 | 84,868,520     |
| CY0113    | Rhexome1.0 | 74,896,873     |
| CY0116    | Rhexome1.0 | 70,087,668     |
| CY0159    | Rhexome1.0 | 91,677,820     |
| CY0161    | Rhexome1.0 | 75,219,097     |
| CY0162    | Rhexome1.0 | 79,116,692     |
| CY0163    | Rhexome1.0 | 106,937,306    |
| CY0164    | Rhexome1.0 | 69,386,970     |
| CY0165    | Rhexome1.0 | 64,028,740     |
| CY0166    | Rhexome1.0 | 93,524,003     |
| CY0340    | Rhexome1.0 | 75,906,691     |
| CY0342    | Rhexome1.0 | 73,222,499     |
| CY0350    | Rhexome1.0 | 74,362,549     |
| CY0351    | Rhexome1.0 | 84,310,849     |
| CY0352    | Rhexome1.0 | 70,706,927     |
| CY0353    | Rhexome1.0 | 79,150,380     |
| CY0354    | Rhexome1.0 | 88,194,729     |
| CY0355    | Rhexome1.0 | 94,317,219     |
| CY0356    | Rhexome1.0 | 69,668,552     |
| CY0389    | Rhexome1.0 | 85,340,992     |
| CY0390    | Rhexome1.0 | 80,091,428     |
| CY0425    | Rhexome1.0 | 81,056,275     |
| CY0558    | Rhexome1.0 | 75,201,169     |
| CY0563    | Rhexome1.0 | 85,879,877     |
| CY0565    | Rhexome1.0 | 69,877,775     |
| CY0567    | Rhexome1.0 | 65,530,642     |
| CY0568    | Rhexome1.0 | 60,616,212     |
| CY0570    | Rhexome1.0 | 65,961,393     |
| CY0571    | Rhexome1.0 | 102,678,998    |
| CY0572    | Rhexome1.0 | 67,916,905     |
| CY0574    | Rhexome1.0 | 67,679,736     |
| CY0576    | Rhexome1.0 | 81,200,016     |
| CY0577    | Rhexome1.0 | 79,947,378     |
| CY0578    | Rhexome1.0 | 89,042,361     |
| CY0579    | Rhexome1.0 | 83,412,702     |
| CY0391    | Rhexome1.0 | 89,015,672     |

### Supplementary Table 3 - Rhexome1.0 target capture components

| <u>Target capture components</u>                                                      | <u>Baspairs</u> |
|---------------------------------------------------------------------------------------|-----------------|
| existing VCRome 2.1 capture target                                                    | 35,250,000      |
| rhesus exons not in VCRome 2.1 design<br>plus those that are under covered (<20x)     | 2,048,175       |
| expanded human MHC class I and class II<br>full gene sequences (exons, introns, UTRs) | 609,840         |
| <hr/> Total                                                                           | <hr/> 2,658,015 |

Supplementary Table 4 - Coverage from VCRome2.1-to-  
"spike-in" mixing ratios for a single rhesus macaque

| Mixing ratio<br>VCRome2.1:"spike-in" | % Bases with 20X<br>coverage in rhesus spike<br>in region excluding<br>VCRome2.1 and MHC |
|--------------------------------------|------------------------------------------------------------------------------------------|
| 1:2.5                                | 84.2                                                                                     |
| 1:1.25                               | 74.5                                                                                     |
| 1:0.5                                | 57.5                                                                                     |

Supplementary Table 5 - MES target capture coverage for 36 MCM

| Animal ID | Unique Aligned MB | Total Reads | Average Coverage | Median Coverage | Percent Reads Hit on Target/Buffer | Percentage 20X Coverage |
|-----------|-------------------|-------------|------------------|-----------------|------------------------------------|-------------------------|
| CY0111    | 8016.41           | 90741390    | 59               | 46              | 45.1                               | 83.6                    |
| CY0113    | 7067.57           | 80055756    | 53               | 41              | 45.3                               | 80.4                    |
| CY0116    | 6589.3            | 74790246    | 48               | 38              | 45.0                               | 78.9                    |
| CY0159    | 8648.13           | 97997910    | 63               | 49              | 44.9                               | 85.5                    |
| CY0161    | 7101.03           | 80311402    | 52               | 41              | 45.2                               | 80.5                    |
| CY0162    | 7476.14           | 84470862    | 55               | 43              | 45.6                               | 82.1                    |
| CY0163    | 10055.8           | 72788326    | 70               | 54              | 66.1                               | 86.9                    |
| CY0164    | 6544.5            | 87613014    | 83               | 63              | 65.8                               | 89.6                    |
| CY0165    | 6044.72           | 86207424    | 82               | 62              | 65.7                               | 89.4                    |
| CY0166    | 8763.37           | 96265496    | 85               | 65              | 62.0                               | 90.2                    |
| CY0340    | 7162.23           | 89882810    | 85               | 65              | 65.8                               | 89.7                    |
| CY0342    | 6905.3            | 95905632    | 90               | 69              | 65.7                               | 91.0                    |
| CY0350    | 7029.02           | 114969498   | 107              | 82              | 64.7                               | 92.7                    |
| CY0351    | 7958.44           | 74716760    | 72               | 55              | 66.3                               | 87.0                    |
| CY0352    | 6684.3            | 68895736    | 66               | 51              | 66.3                               | 85.5                    |
| CY0353    | 7362.63           | 100872546   | 92               | 71              | 63.9                               | 91.6                    |
| CY0354    | 8170.49           | 81730006    | 77               | 59              | 65.8                               | 88.7                    |
| CY0355    | 8919.98           | 78704202    | 76               | 57              | 66.3                               | 87.5                    |
| CY0356    | 6519.04           | 74468684    | 78               | 60              | 71.6                               | 88.6                    |
| CY0389    | 7960.62           | 91526036    | 94               | 72              | 70.8                               | 91.3                    |
| CY0390    | 7476.61           | 85798910    | 89               | 68              | 71.3                               | 90.5                    |
| CY0425    | 7582.24           | 86893730    | 90               | 69              | 71.3                               | 90.5                    |
| CY0558    | 7034.09           | 80547430    | 84               | 64              | 71.2                               | 89.8                    |
| CY0563    | 8033.95           | 91861906    | 96               | 73              | 71.4                               | 91.3                    |
| CY0565    | 6604.94           | 79808246    | 78               | 62              | 68.5                               | 91.0                    |
| CY0567    | 6153.84           | 90310086    | 91               | 72              | 69.2                               | 92.7                    |
| CY0568    | 5689.37           | 75590434    | 76               | 60              | 69.9                               | 90.3                    |
| CY0570    | 6230.34           | 84852852    | 79               | 63              | 65.6                               | 91.3                    |
| CY0571    | 9701.21           | 94613268    | 86               | 69              | 64.1                               | 92.5                    |
| CY0572    | 6304.07           | 100947384   | 102              | 81              | 69.3                               | 93.7                    |
| CY0574    | 6338.17           | 73252200    | 73               | 58              | 66.9                               | 90.1                    |
| CY0576    | 7586.82           | 68732488    | 66               | 53              | 65.6                               | 88.8                    |
| CY0577    | 7476.49           | 63514718    | 61               | 49              | 65.2                               | 87.4                    |
| CY0578    | 8212.38           | 69106484    | 69               | 55              | 67.2                               | 89.0                    |
| CY0579    | 7809.03           | 107626816   | 106              | 84              | 66.4                               | 94.3                    |
| CY0391    | 8330.84           | 71274028    | 65               | 53              | 63.3                               | 88.6                    |
| Average   | 7,432             | 84,656,798  | 77.7             | 60.4            | 63.4                               | 88.7                    |



Supplementary Table 6 - Comparisson of alleles identified by PacBio CCS versus WGS/MES

| Haplotype | Accession | Gene     | Pacbio CCS | WGS/MES |
|-----------|-----------|----------|------------|---------|
| K1        | KX892645  | KIR1D    | Y          | Y       |
| K1K7      | KX892646  | KIR2DL4  | Y          | Y       |
| K1        | KX892648  | KIR3DS   | Y          | Y       |
| K1        | KX892649  | KIR3DL7  | Y          | Y       |
| K1        | KX892650  | KIR3DL11 | Y          | Y       |
| K2        | KX892652  | KIR1D    | Y          | Y       |
| K2K4K5    | KX892653  | KIR2DL4  | Y          | Y       |
| K2        | KX892654  | KIR3DL2  | Y          | N       |
| K2        | KX892656  | KIR3DL2  | Y          | Y       |
| K2        | KX892657  | KIR3DS   | Y          | Y       |
| K2        | KX892658  | KIR3DS   | Y          | Y       |
| K2        | KX892659  | KIR3DS   | Y          | Y       |
| K2        | KX892660  | KIR3DL1  | Y          | Y       |
| K2        | KX892661  | KIR3DL7  | Y          | Y       |
| K2        | KX892662  | KIR3DL7  | Y          | Y       |
| K3K4      | KX892663  | KIR1D    | Y          | N       |
| K3        | KX892665  | KIR2DL4  | Y          | Y       |
| K3        | KX892667  | KIR3DL2  | Y          | Y       |
| K3        | KX892668  | KIR3DS   | Y          | Y       |
| K3        | KX892669  | KIR3DL11 | Y          | Y       |
| K4        | KX892670  | KIR3DL2  | Y          | Y       |
| K4        | KX892673  | KIR3DS   | Y          | Y       |
| K4        | EU419118  | KIR3DL7  | N          | Y       |
| K4        | KX892674  | KIR3DL11 | Y          | Y       |
| K5        | EU419100  | KIR3DL2  | N          | Y       |
| K5        | KX892676  | KIR3DL2  | Y          | Y       |
| K5        | KX892679  | KIR3DS   | Y          | Y       |
| K5        | KX892680  | KIR3DS   | Y          | Y       |
| K5        | KX892681  | KIR3DS   | Y          | Y       |
| K5        | KX892682  | KIR3DL1  | Y          | Y       |
| K5        | KX892683  | KIR3DL7  | Y          | Y       |
| K5        | KX892684  | KIR3DL7  | Y          | Y       |
| K6        | KX892685  | KIR1D    | Y          | N       |
| K6        | KX892686  | KIR3DL2  | Y          | Y       |
| K6        | KX892687  | KIR3DS   | Y          | Y       |
| K6        | KX892688  | KIR3DS   | Y          | Y       |
| K6        | KX892689  | KIR3DS   | Y          | N       |
| K6        | KX892690  | KIR3DL11 | Y          | Y       |
| K7        | EU419107  | KIR3DL20 | N          | Y       |
| K7        | KX892691  | KIR3DL2  | Y          | Y       |
| K7        | KX892693  | KIR3DS   | Y          | Y       |
| K7        | KX892694  | KIR3DS   | Y          | Y       |
| K7        | KX892695  | KIR3DL7  | Y          | Y       |
| K7        | KX892697  | KIR3DL11 | Y          | N       |
| K8        | KX892698  | KIR1D    | Y          | Y       |
| K8        | KX892699  | KIR3DS   | Y          | Y       |
| K8        | KX892700  | KIR3DL7  | Y          | N       |
| K8        | KX892701  | KIR3DL7  | Y          | Y       |
| K8        | KX892703  | KIR3DL11 | Y          | N       |
